# Supplementary material for: Genetic Factors That Could Affect Concussion Risk in Elite Rugby
Source: Sports (Basel). 2021 Jan 22;9(2):19. doi: 10.3390/sports9020019 (PMC7910946; doi:10.3390/sports9020019)
Supplement: Supplementary file 1 [file sports-09-00019-s001.pdf]

# Supplementary Materials: Genetic Factors that Could Affect Concussion Risk in Elite Rugby

Mark R. Antrobus <sup>1,2,\*</sup>, Jon Brazier <sup>1,3</sup>, Georgina K. Stebbings <sup>1</sup>, Stephen H. Day <sup>4</sup>, Shane M. Heffernan <sup>5</sup>, Liam P. Kilduff <sup>5</sup>, Robert M. Erskine <sup>6,7</sup> and Alun G. Williams <sup>1,7</sup>

<sup>1</sup> Sports Genomics Laboratory, Department of Sport and Exercise Sciences, Manchester Metropolitan University, Manchester M1 5GD, UK; j.brazier2@herts.ac.uk (J.B.); g.stebbing@mmu.ac.uk (G.K.S.); a.g.williams@mmu.ac.uk (A.G.W.)

<sup>2</sup> Sport and Exercise Science, University of Northampton, Northampton NN1 5PH, UK

<sup>3</sup> Department of Psychology and Sports Sciences, University of Hertfordshire, Hatfield AL10 9AB, UK

<sup>4</sup> Faculty of Science and Engineering, University of Wolverhampton, Wolverhampton WV1 1LY, UK; stephen.day@wlv.ac.uk

<sup>5</sup> Applied Sports, Technology, Exercise and Medicine (A-STEM) Research Centre, College of Engineering, Swansea University, Swansea SA1 8EN, UK; s.m.heffernan@swansea.ac.uk (S.M.H.); l.kilduff@swansea.ac.uk (L.P.K.)

<sup>6</sup> Research Institute for Sport & Exercise Sciences, Liverpool John Moores University, Liverpool L3 3AF, UK; r.m.erskine@ljmu.ac.uk

<sup>7</sup> Institute of Sport, Exercise and Health, University College London, London WC1E 6BT, UK

\* Correspondence: mark.antrobus@northampton.ac.uk

---

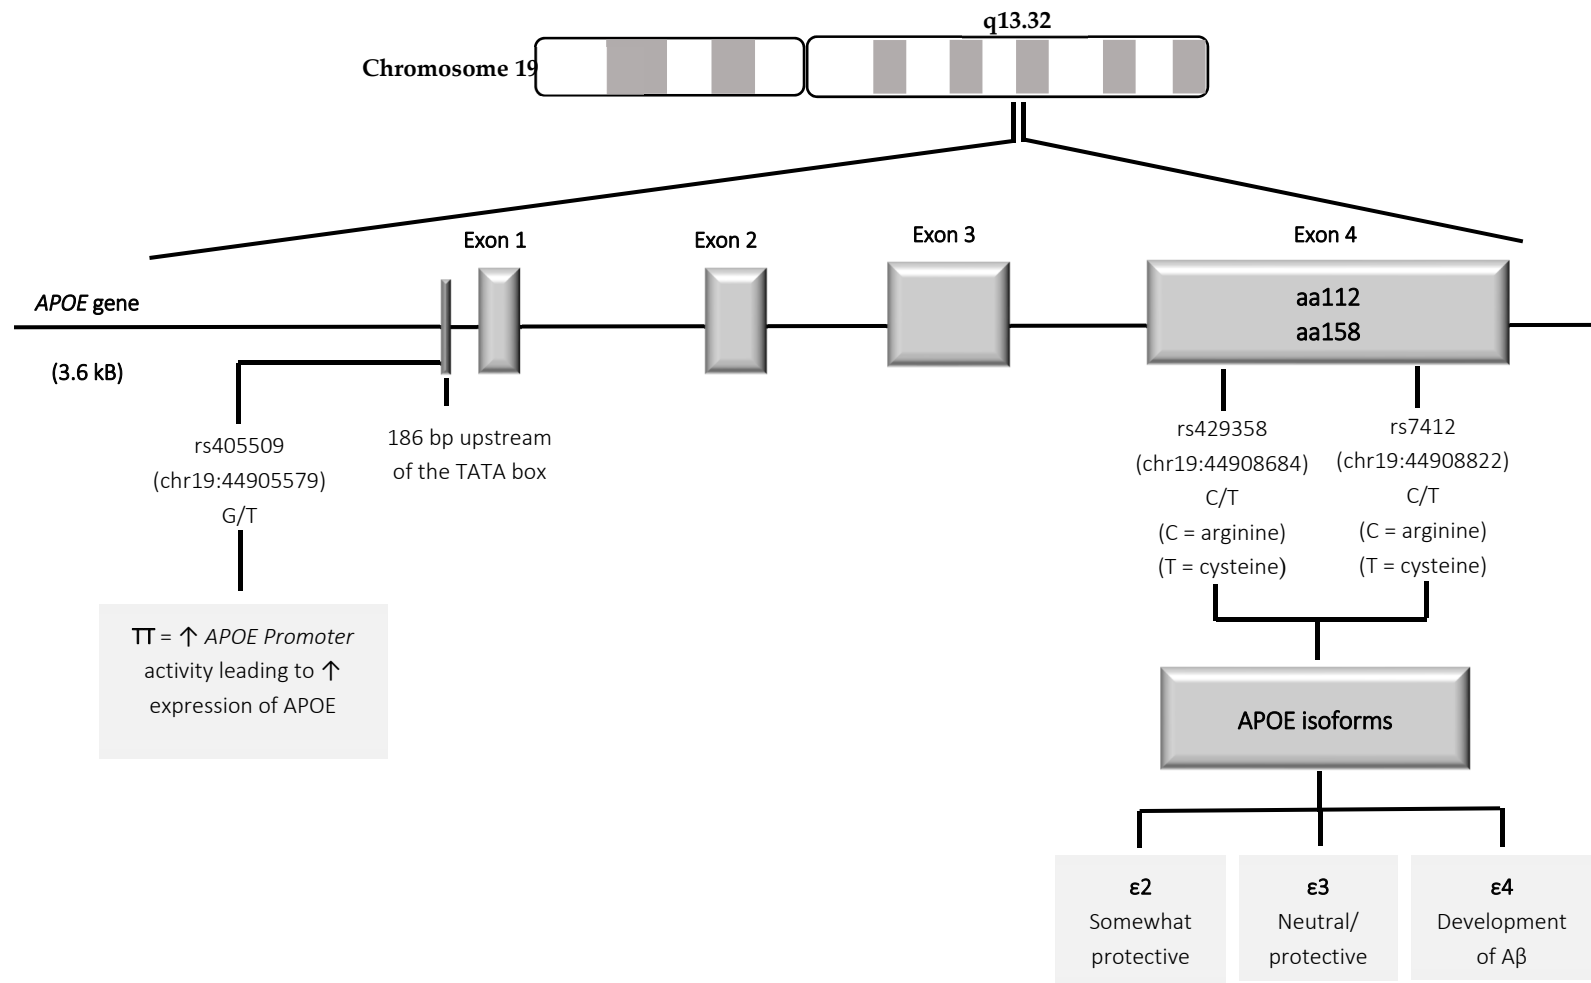

**Figure S1.** Schematic of *APOE* variants: The  $\epsilon 2$  isoform binds with amyloid plaques ( $A\beta$ ) and is removed enabling neuronal modelling and plasticity of neurons to be facilitated. The  $\epsilon 3$  isoform binds with less affinity to  $A\beta$ , interacts with microtubules and is associated with neurite extension and branching. It also binds with tau to stabilise microtubules. The  $\epsilon 4$  isoform does not bind with  $A\beta$ , meaning the activity of toxic cleaved APOE fragments can cause lysosomal leakage, leading to apoptosis and stimulation of tau and the formation of neurodegenerative neurofibrillary tangles

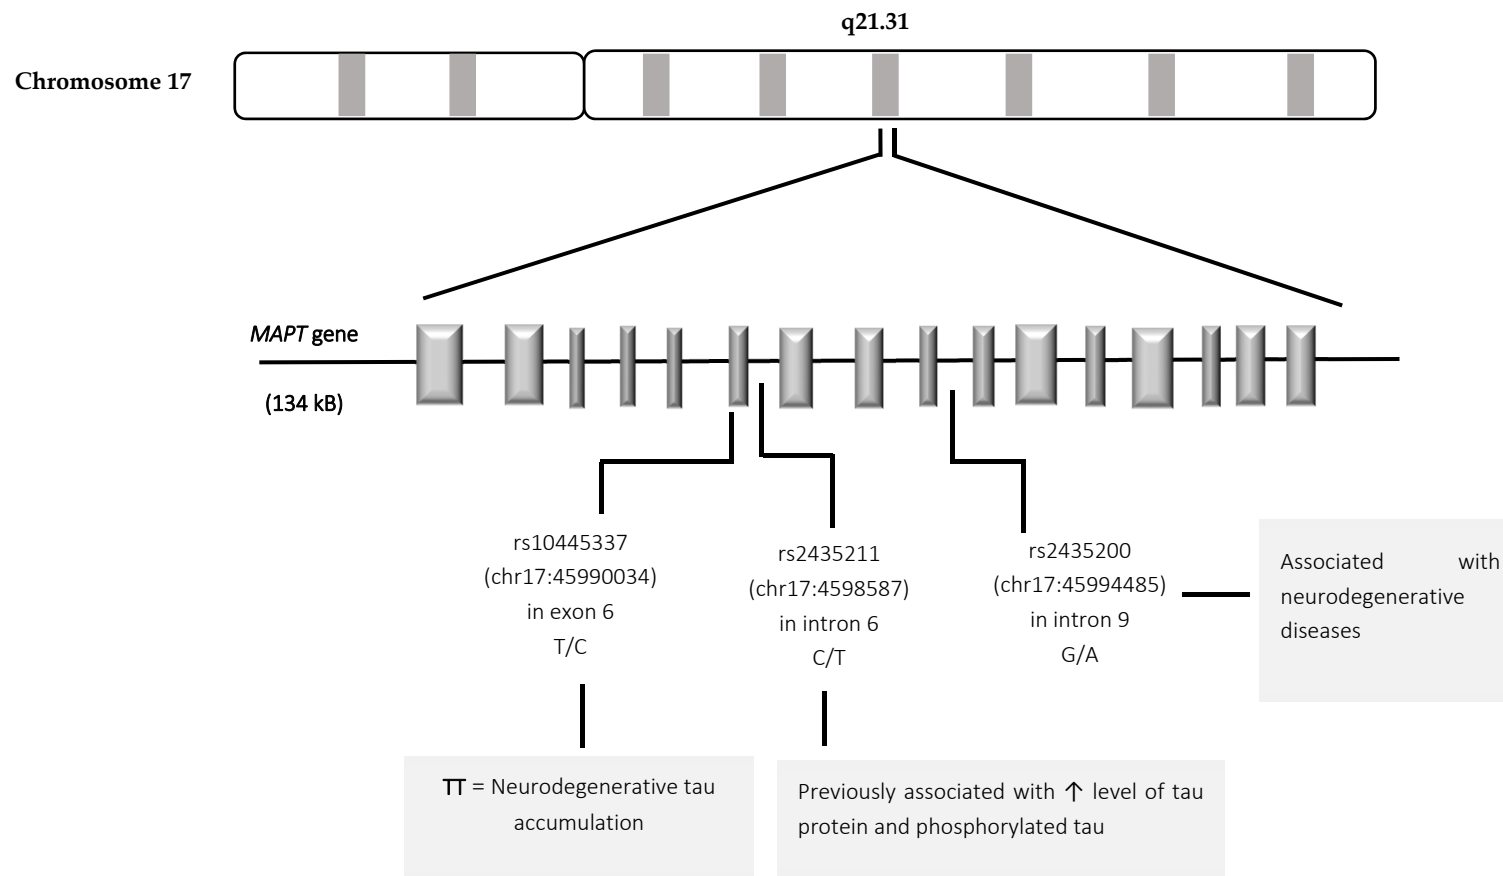

**Figure S2.** Schematic of *MAPT* polymorphisms associated with accumulation of tau clumps and the formation of neurofibrillary tangles and neuritic plaques.

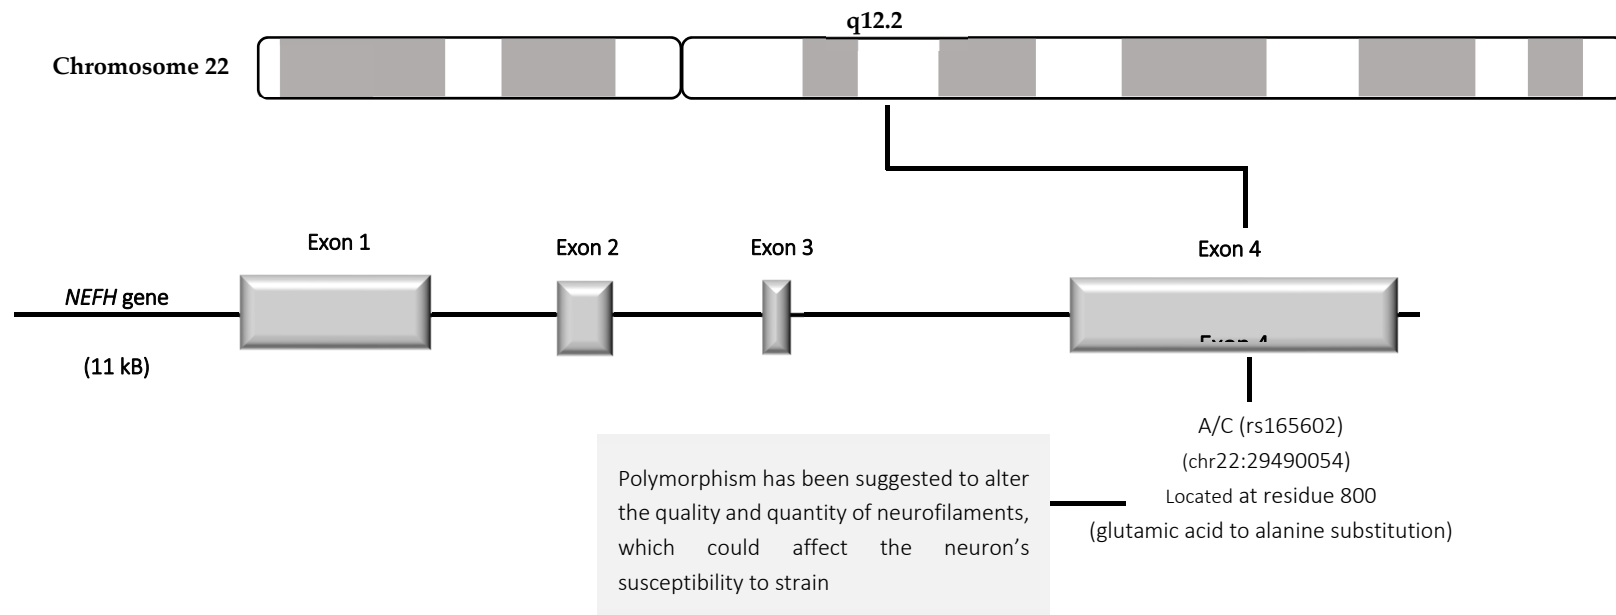

**Figure S3.** Schematic of rs165602 *NEFH* that encodes the heavy protein subunit of neurofilament, which combines with the medium and light subunits to form the neuronal cytoskeleton.

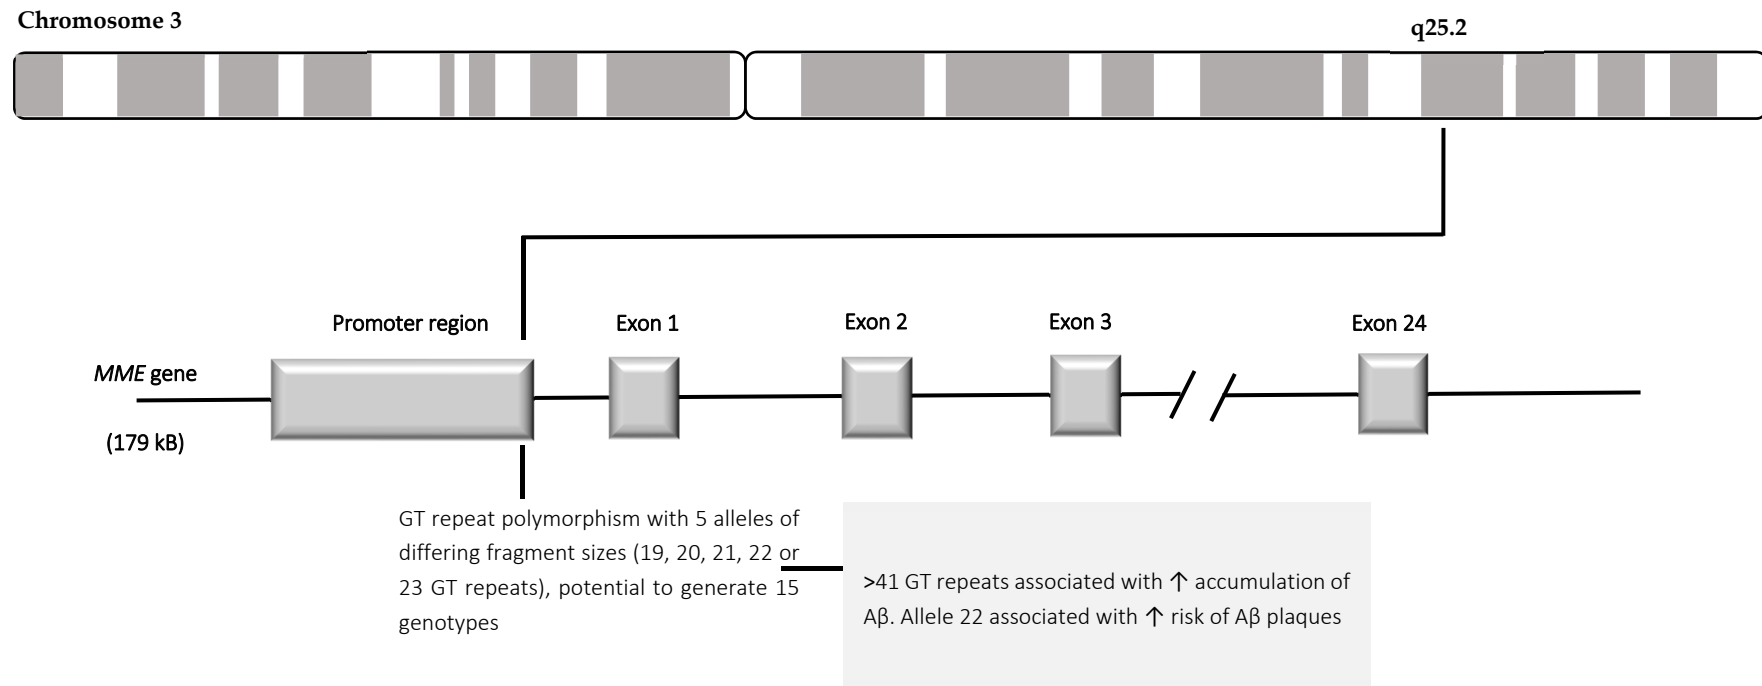

**Figure S4.** Schematic of GT repeat promoter polymorphism located in *MME* gene which encodes for neprilysin. Aβ, amyloid plaque.

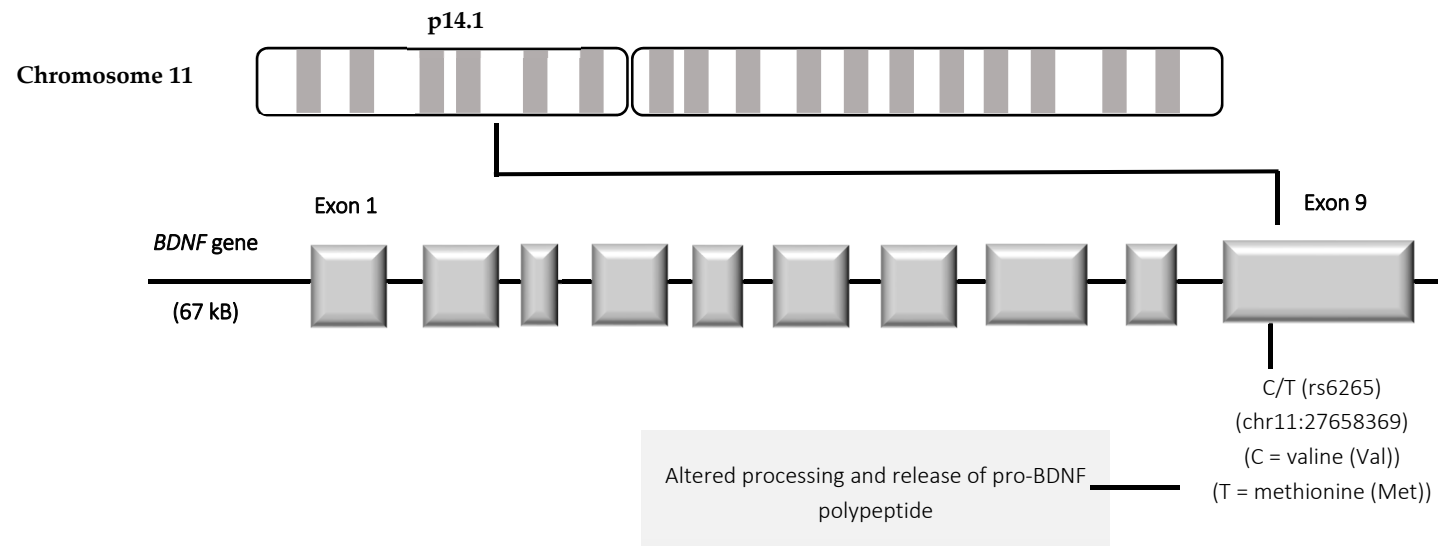

**Figure S5.** Schematic of *BDNF* (rs6265) Val to Met substitution results in poor packaging and intracellular protein trafficking of pro-BDNF polypeptide.

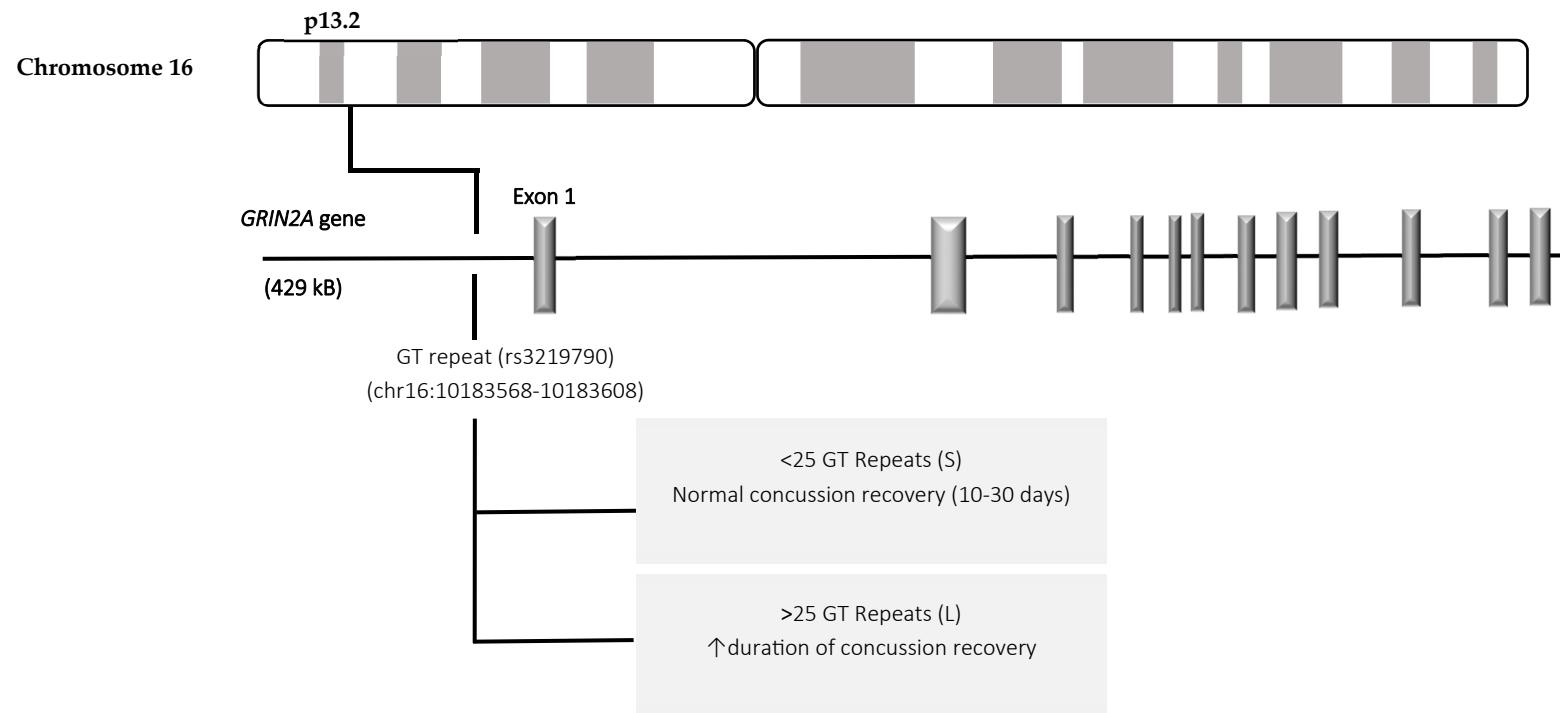

**Figure S6.** Schematic of *GRIN2A* promoter (rs3219790) the longer the GT repeat the lower the *GRIN2A* promoter activity.

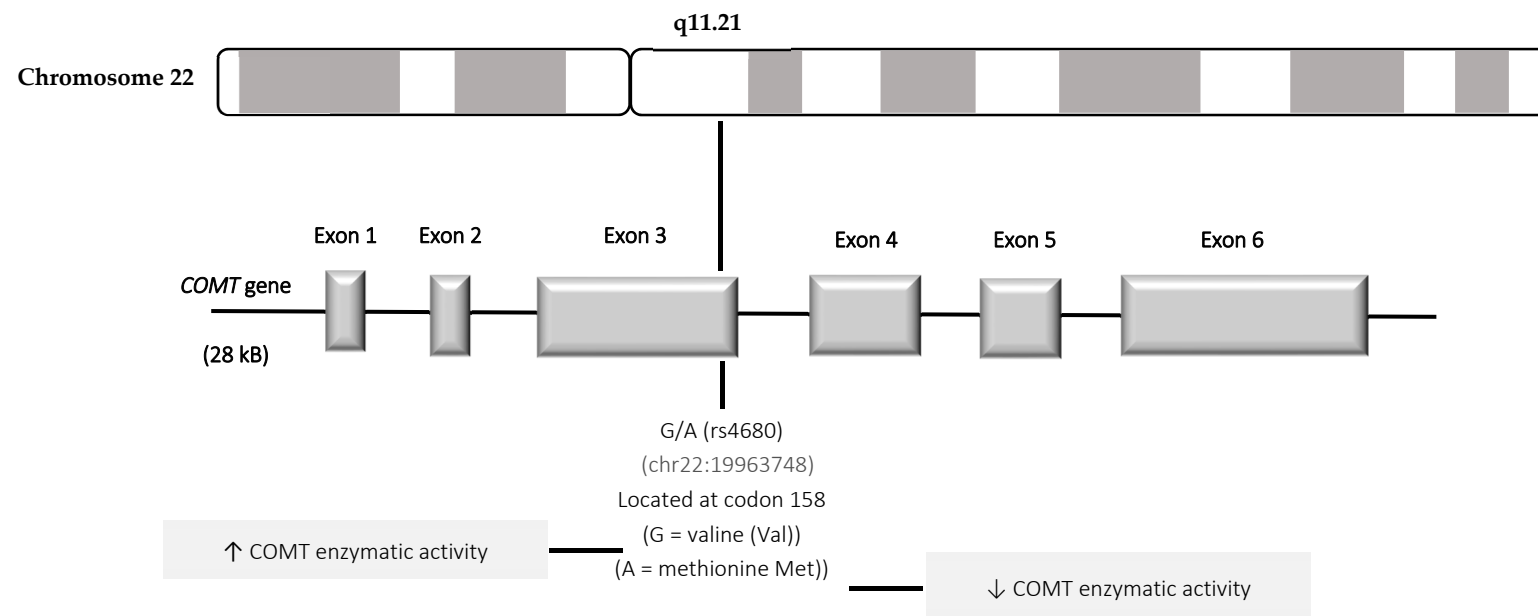

**Figure S7.** Schematic of rs4680 Catechol-O-methyltransferase.

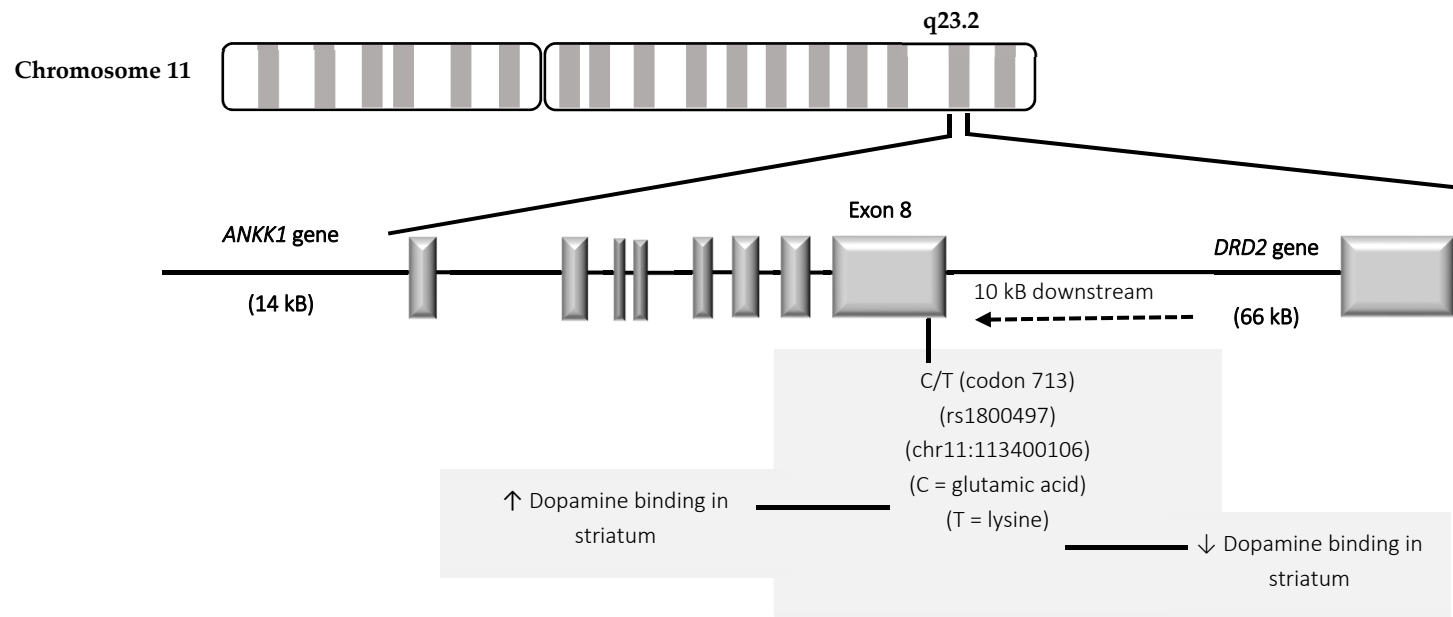

**Figure S8.** Schematic of *ankyrin repeat and kinase domain containing 1* (rs1800497). T allele of *ANKK1* has been associated with dopaminergic function.

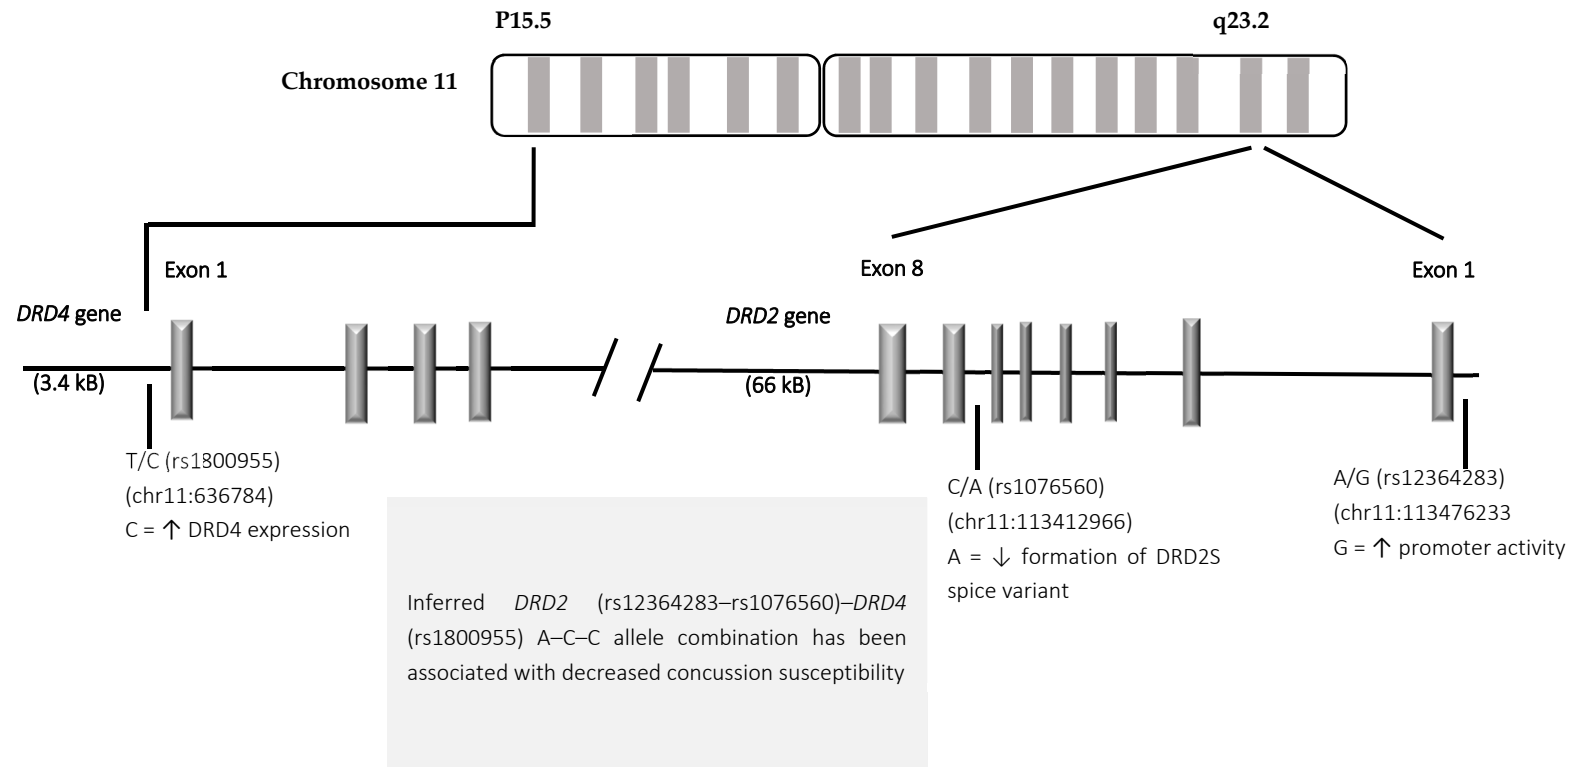

**Figure S9.** Schematic of *DRD2* (rs1076560 and rs12364283) and *DRD4* (rs1800955).

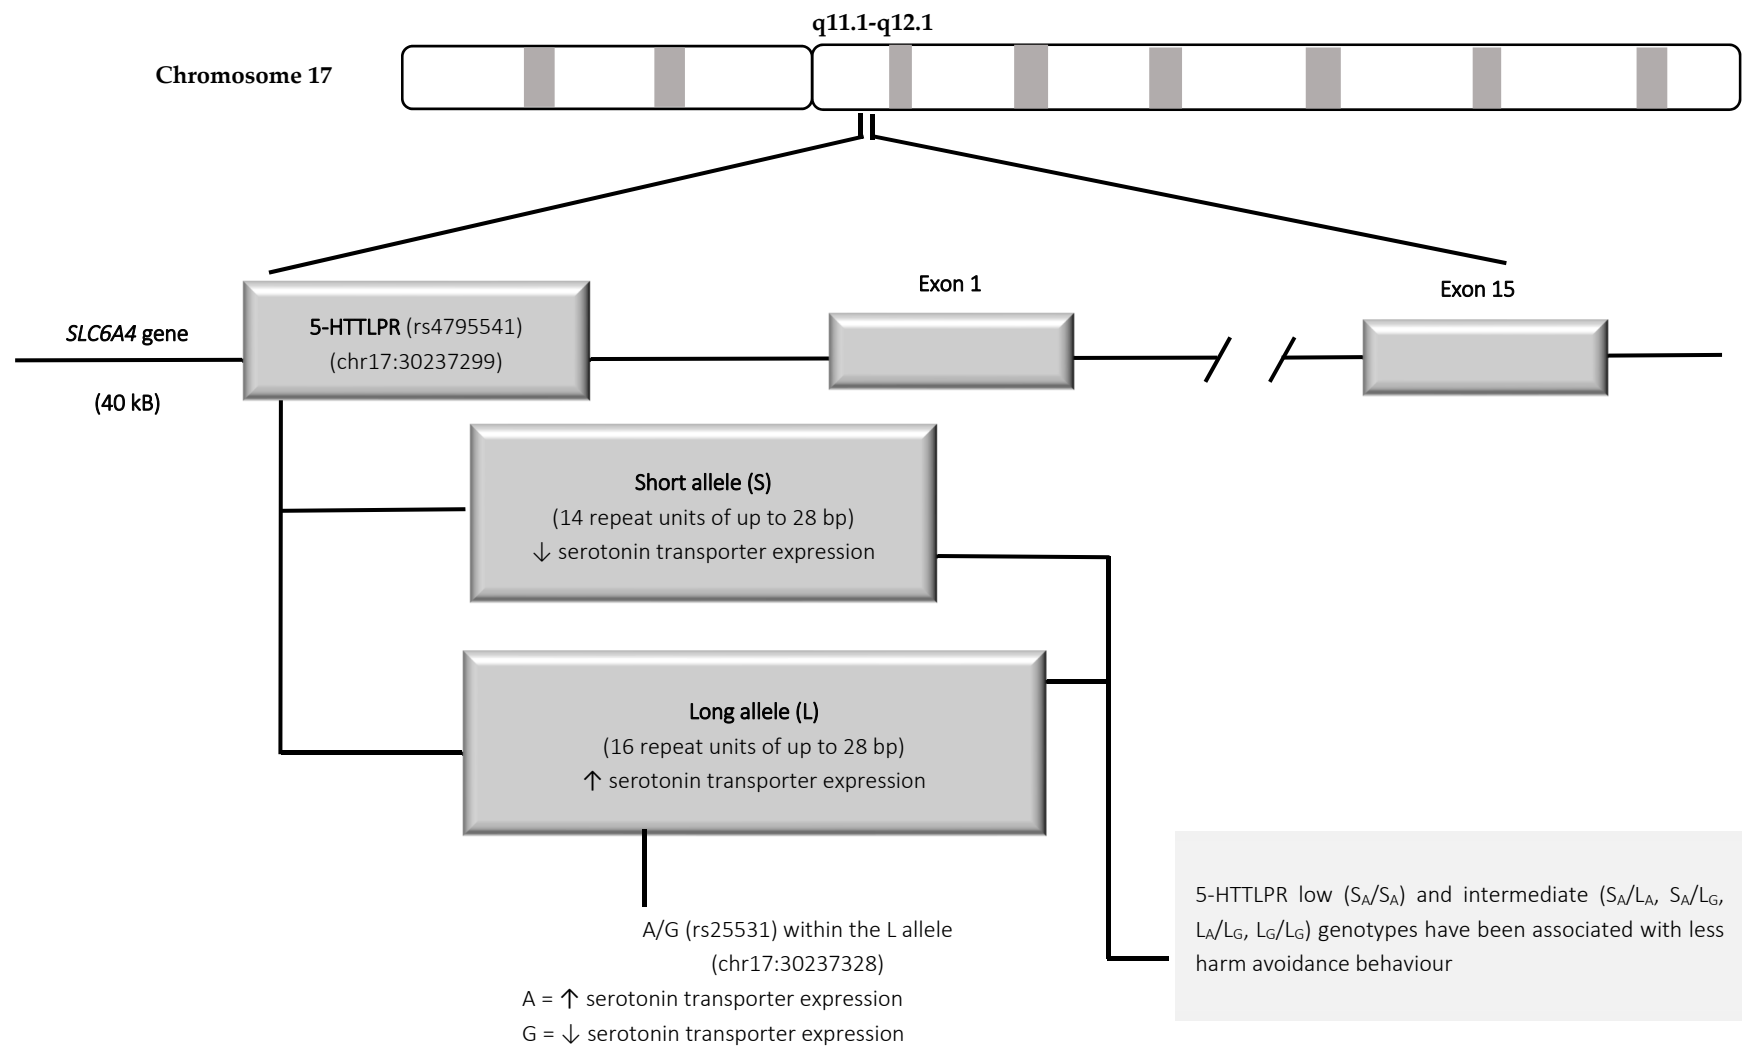

**Figure S10.** Schematic of rs4795541 5-HTTLPR, in conjunction with rs25531.

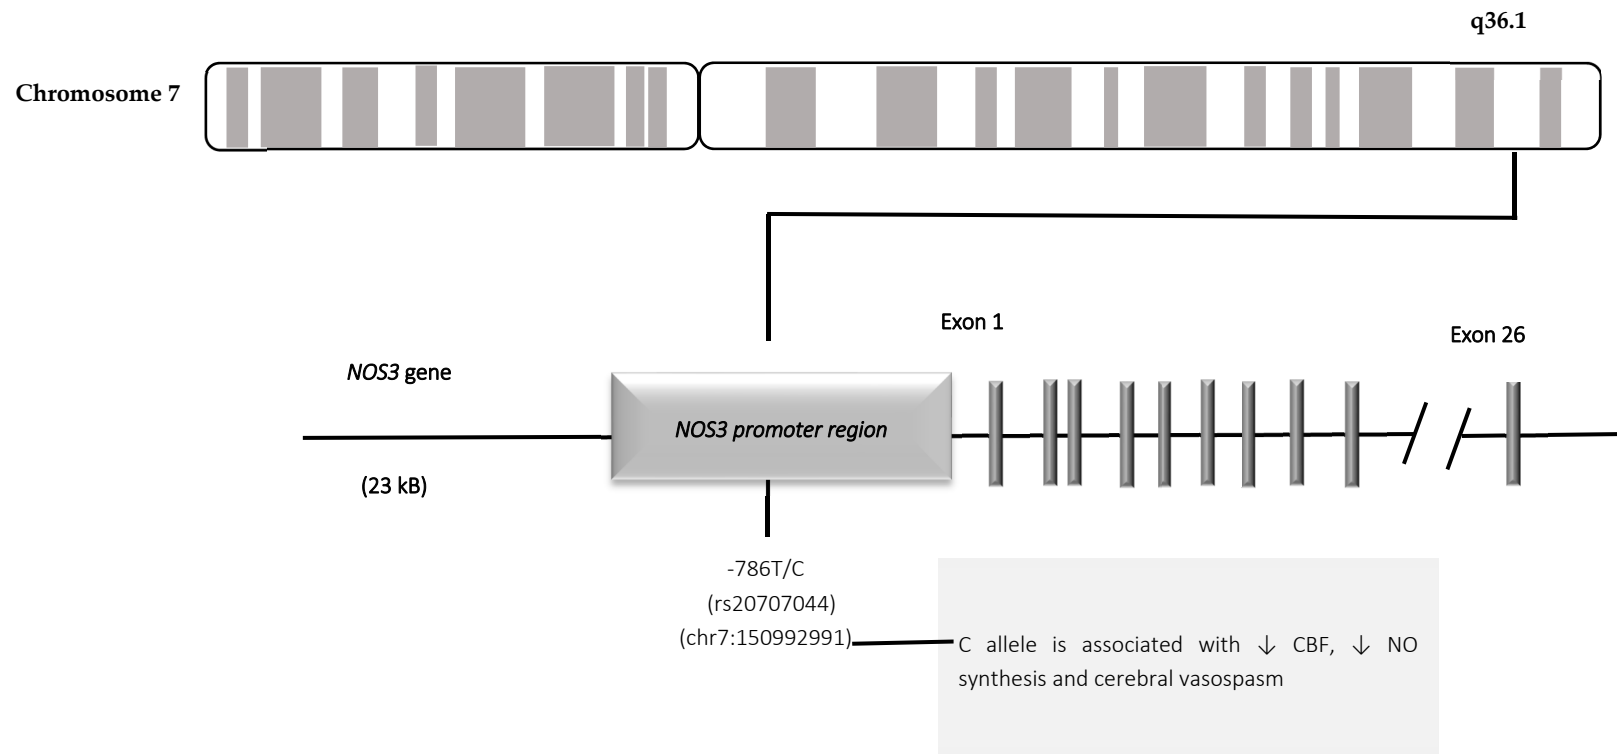

**Figure S11.** Schematic of rs2070744 *NOS3* C allele is associated with reduced cerebral blood flow in traumatic brain injury patients.

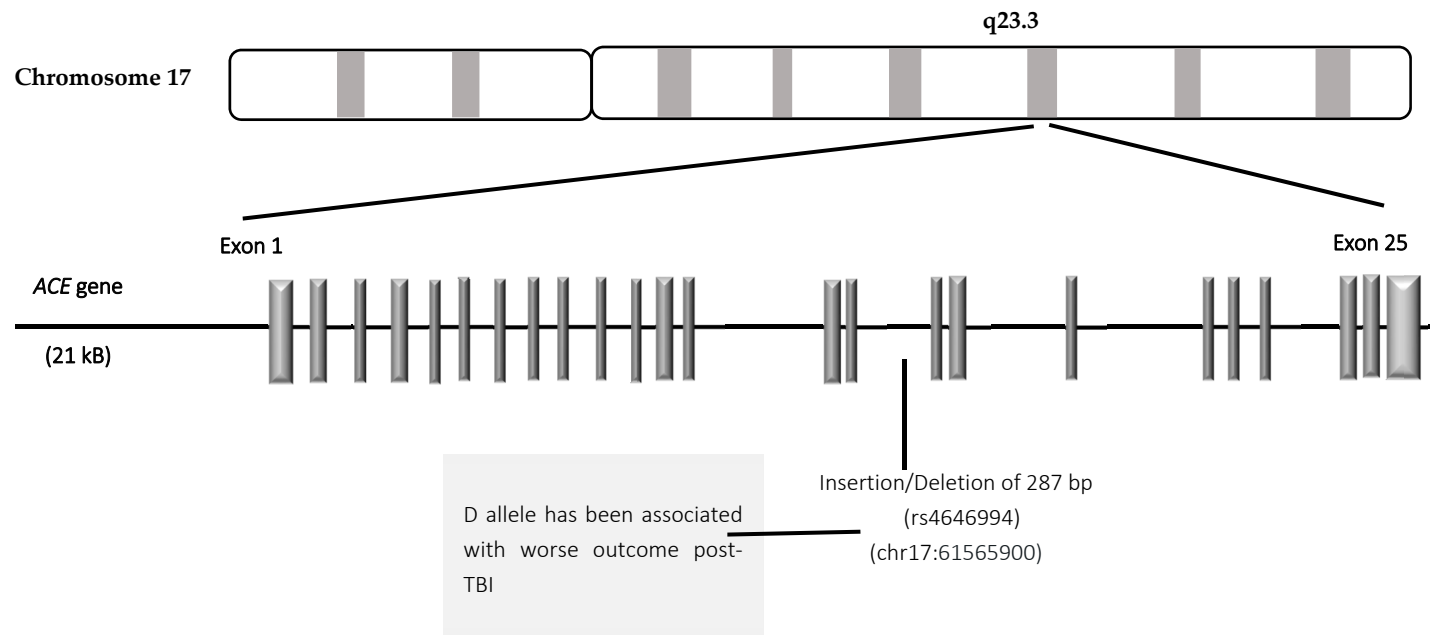

**Figure S12.** Schematic of *ACE* (rs4646994). A 287bp Alu insertion (I)/deletion (D) polymorphism, D/D homozygous carriers exhibit higher circulating and tissue ACE activity.

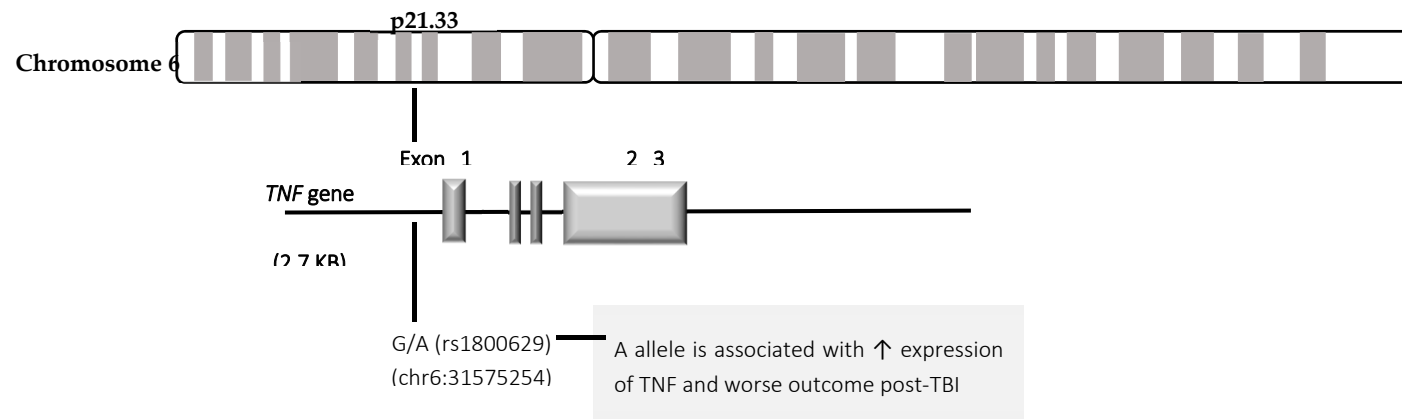

**Figure S13.** Schematic of *TNF* (rs1800629) A allele is associated with worse outcome post-TBI.

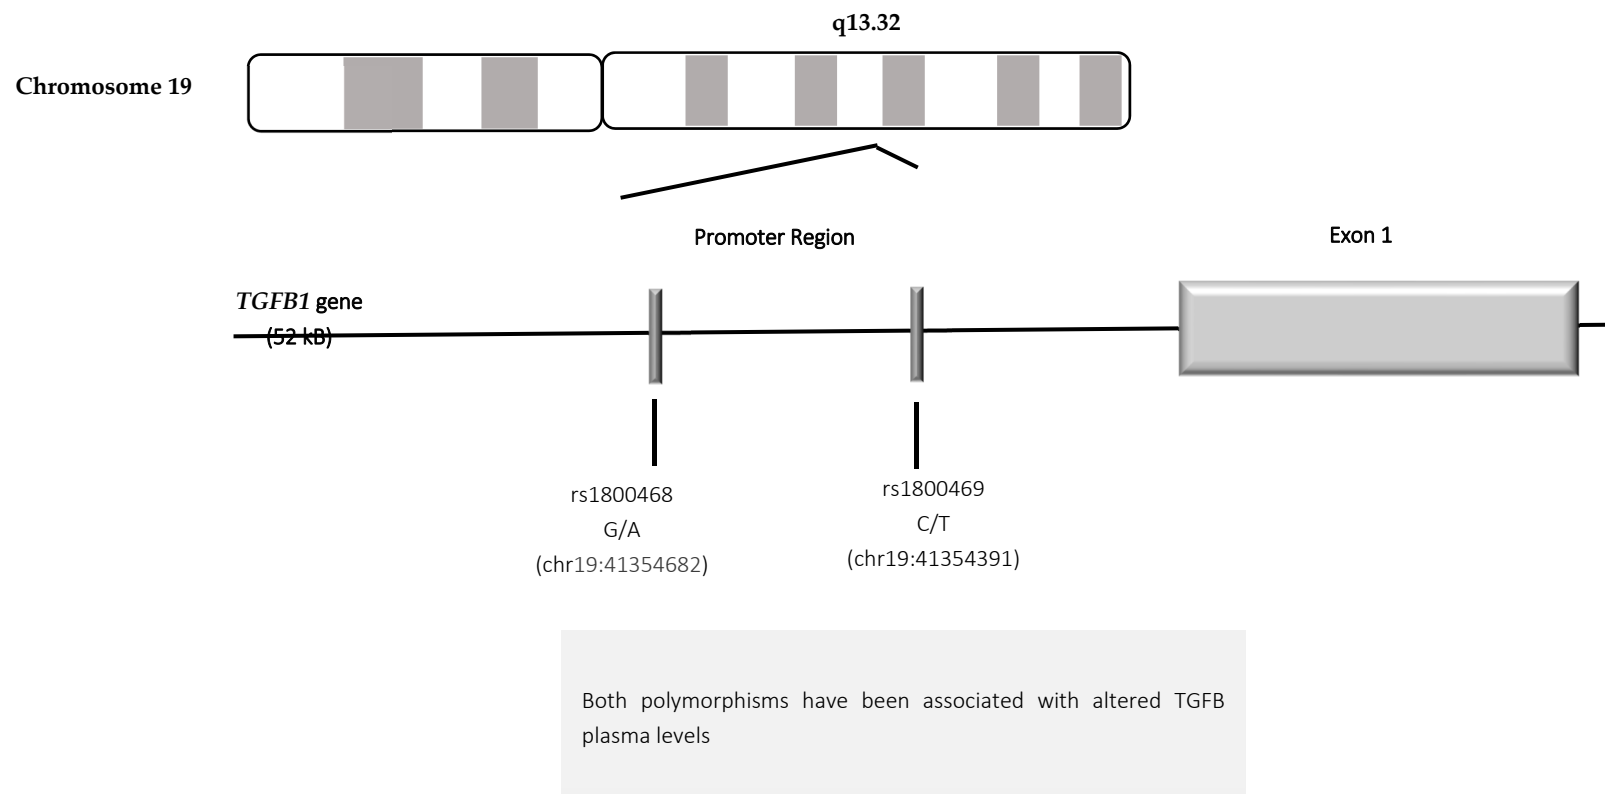

**Figure S14.** Schematic of *Transforming growth factor beta1* (rs1800468 and rs1800469).

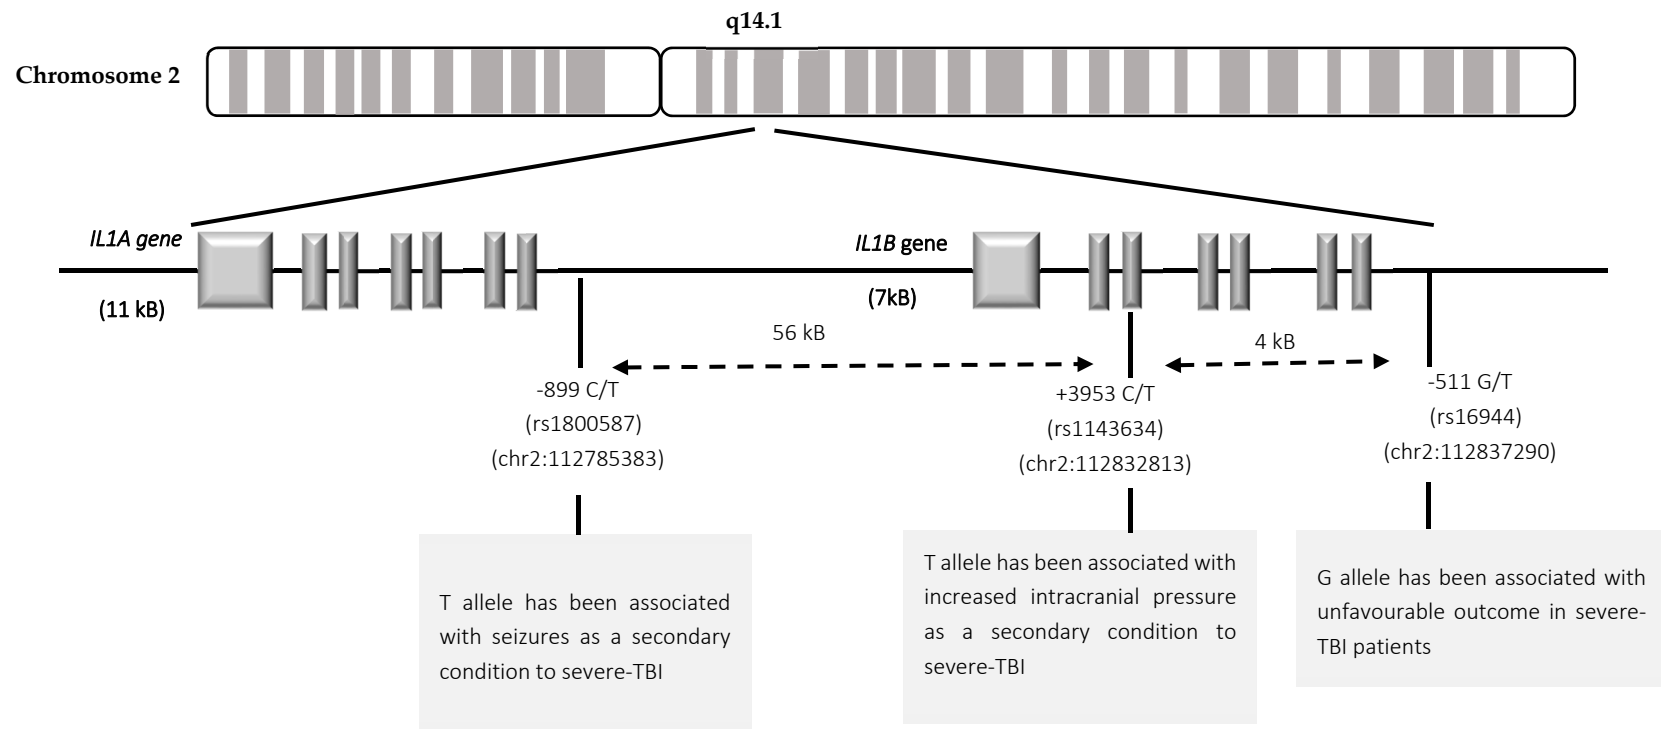

**Figure S15.** Schematic of *Interleukin 1 alpha* (rs1800587) and *Interleukin 1 beta* (rs16944 and rs1143634).

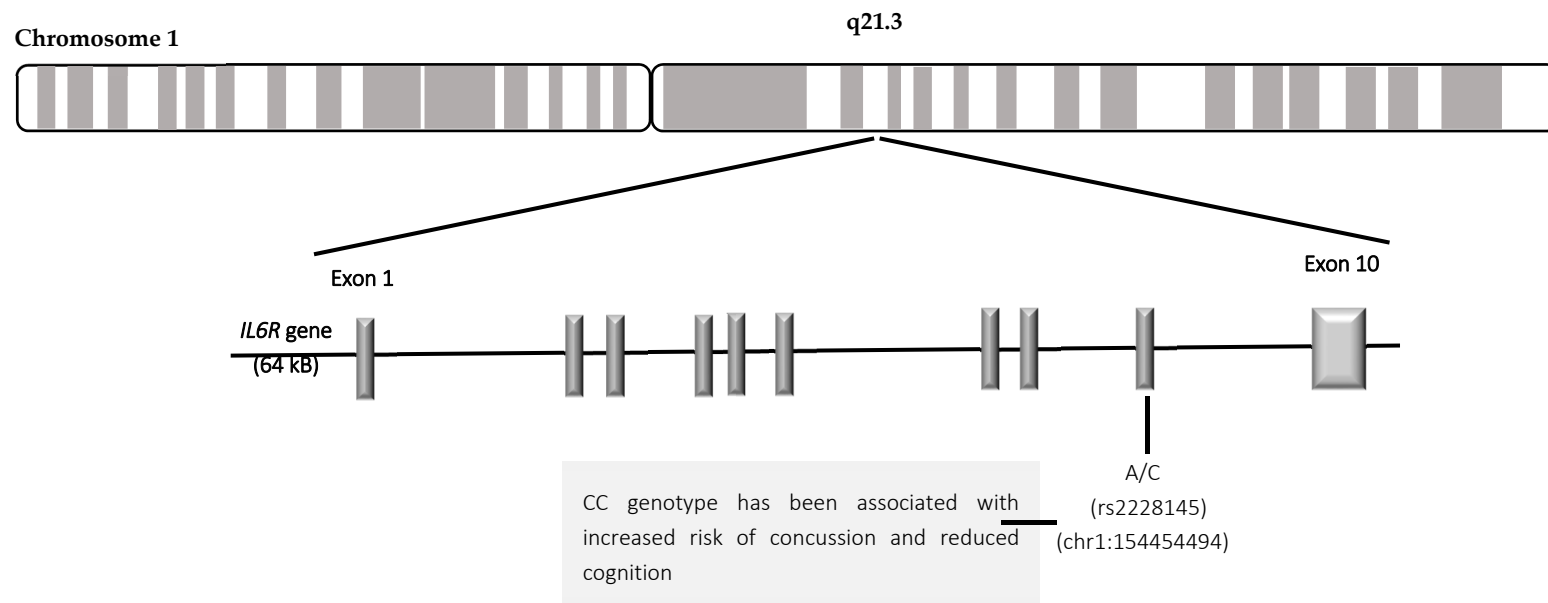

**Figure S16.** Schematic of rs2228145 *interleukin 6 receptor*. This SNP results in an amino acid substitution of aspartic acid for alanine and is associated with a two-fold increase in soluble IL6R serum levels.
